# Supplementary material for: Spatiotemporal variations of the oxycline and its response to subduction events in the Arabian Sea
Source: Frontiers journal article supplement (doi:10.3389/fmars.2023.1171614), 2023-06-27
Supplement: Data_Sheet_1.DOCX [file Data_Sheet_1.DOCX]

Supplementary Material

# Supplementary Figures


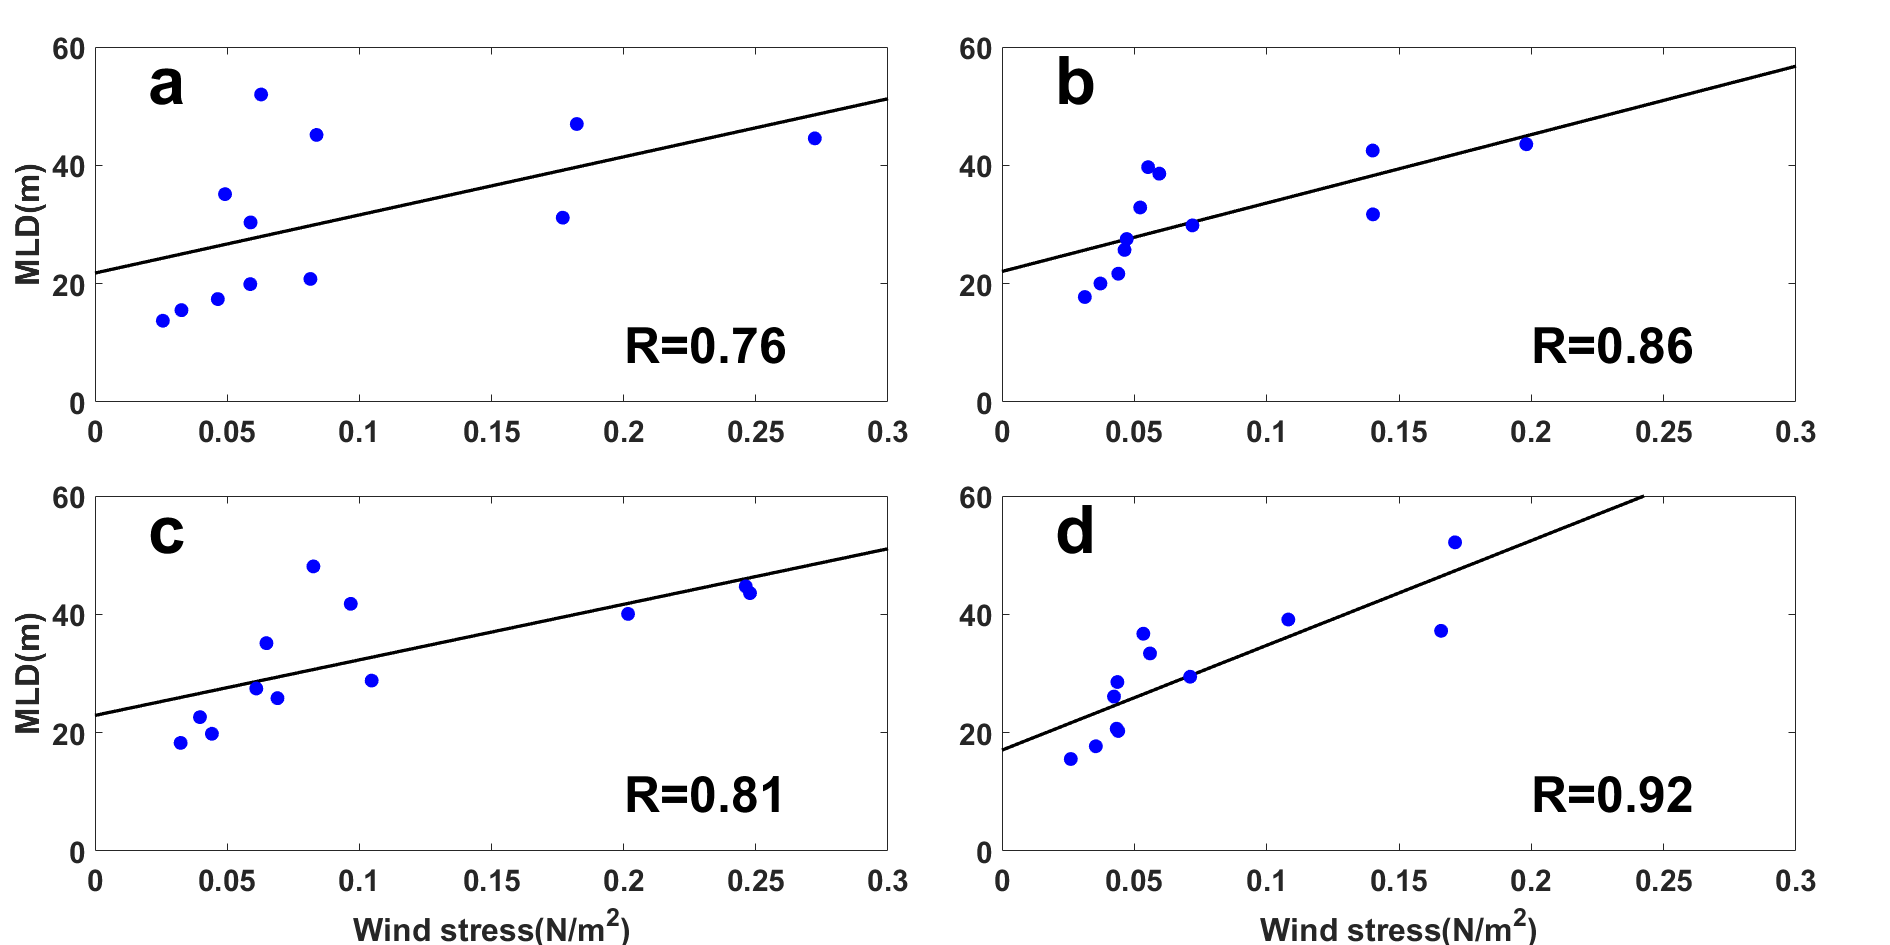


**Supplementary Figure 1.** Correlations between wind stress and MLD by region: (a) NW (R = 0.76), (b) NE (R = 0.86), (c) SW (R = 0.81), (d) SE (R = 0.92).


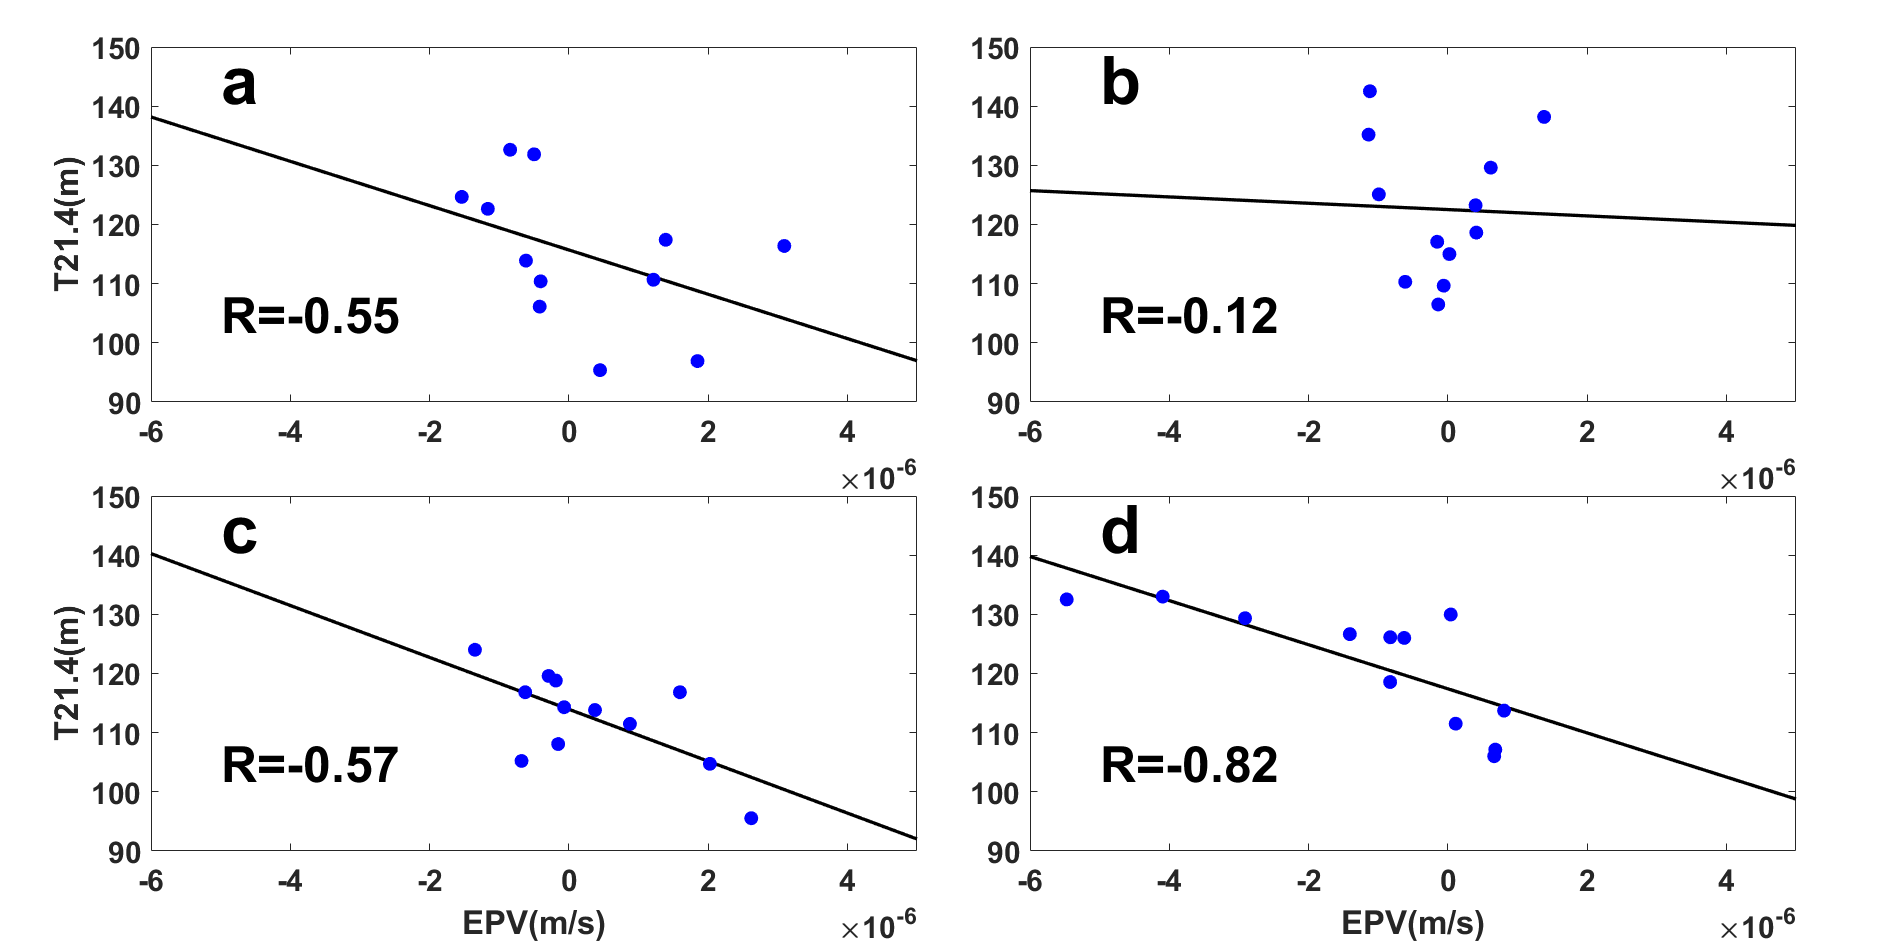


**Supplementary Figure 2.** Correlations between EPV and isotherm by region: (a) NW (R = −0.55), (b) NE (R = −0.12), (c) SW (R = −0.57), (d) SE (R = −0.82).


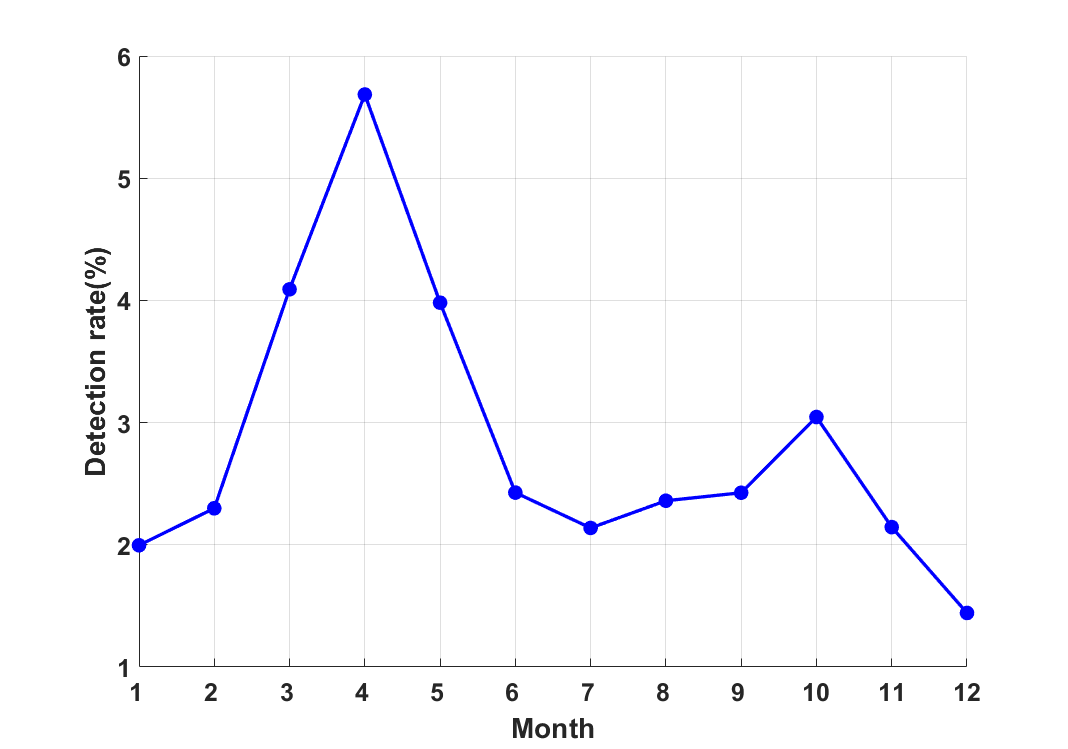


**Supplementary Figure 3.** Monthly probability density distribution of detected subduction profiles.
